# Supplementary material for: Synthesis of polystyrene with cyclic, ionized and neutralized end groups and the self-assemblies templated by breath figures
Source: Royal Society of Chemistry journal article supplement (doi:10.1039/c4py00101j), 2014-01-01
Supplement: c4py00101j1.pdf [file c4py00101j1.pdf]

## Electronic Supplementary Information (ESI)

Synthesis of Polystyrene with Cyclic, Ionized, Neutralized End  
Groups and the Self-Assemblies Templated by Breath Figures

Liang-Wei Zhu,<sup>a</sup> Wu Yang,<sup>a</sup> Yang Ou,<sup>a</sup> Ling-Shu Wan<sup>a,b,\*</sup> and Zhi-Kang Xu<sup>a</sup>

<sup>a</sup>MOE Key Laboratory of Macromolecular Synthesis and Functionalization,  
Department of Polymer Science and Engineering, Zhejiang University,  
Hangzhou 310027, China

<sup>b</sup>State Key Laboratory of Materials-Oriented Chemical Engineering, Nanjing  
University of Technology, Nanjing 210009, China

\*Corresponding author. Phone: +86-571-87953763. E-mail: lswan@zju.edu.cn.

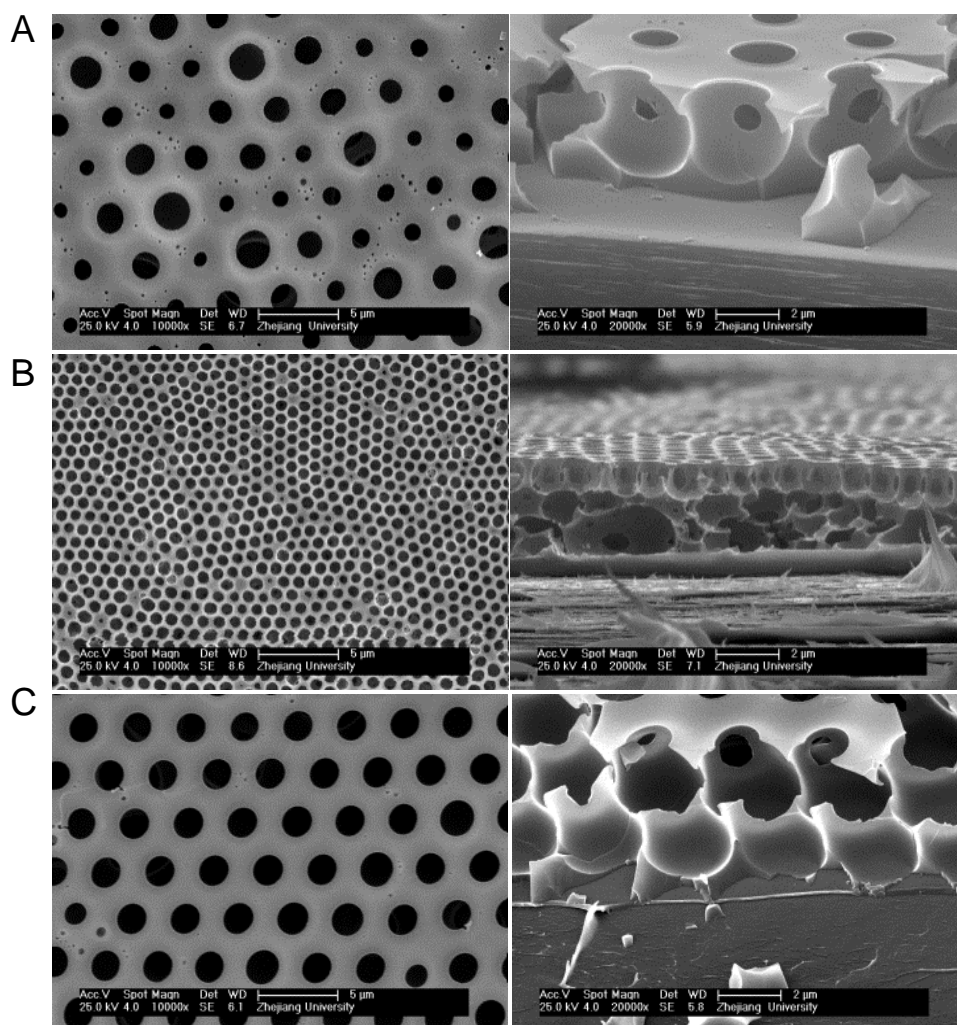

**Fig. S1** Top-down (left panel) and cross-section (right panel) SEM images of honeycomb films prepared from 10 mg/mL solutions of (A) PS-cyl, (B) PS-ion, and (C) PS-neu.
